# Supplementary material for: Janus monolayer PXC (X = As/Sb) for photocatalytic water splitting with a negative Poisson's ratio
Source: Royal Society of Chemistry journal article supplement (doi:10.1039/d3cp04930b), 2024-01-01
Supplement: d3cp04930b1.pdf [file d3cp04930b1.pdf]

*Supplementary information (SI) for*

**Janus monolayer PXC (X= As and Sb) for photocatalytic  
water splitting with negative poisson's ratio**

Yunlai Zhu <sup>a</sup>, Shuo Jiang <sup>a</sup>, Jishun Zhang <sup>a</sup>, Xiaoteng Wang <sup>a</sup>, Zihan Qu <sup>a</sup>, Zuheng Wu <sup>a</sup>, Zuyu Xu <sup>a</sup>, Wei Hu <sup>a</sup>, Yuehua Dai <sup>a</sup>, and Fei Yang <sup>a\*</sup>

<sup>a</sup> School of Integrated Circuits, Anhui University, Hefei, Anhui, 230601, China.

**Corresponding Author**

\*E-mail: feiyang-0551@163.com (F. Yang)

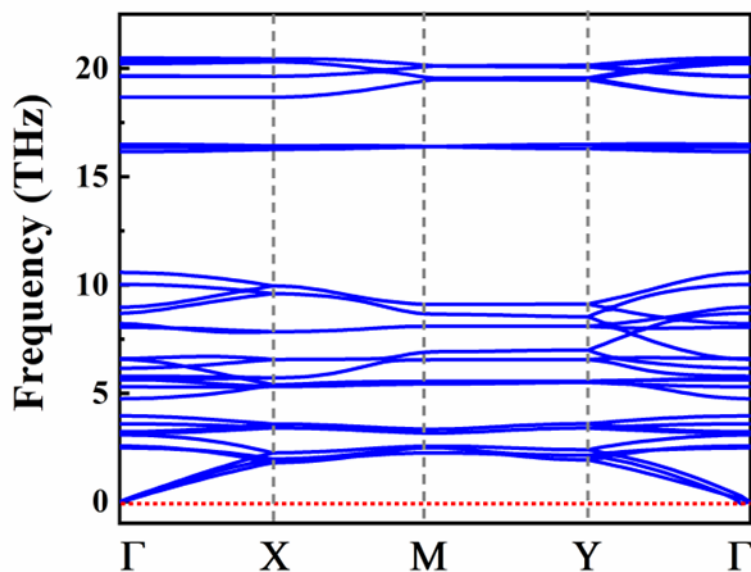

**Fig. S1** The phonon spectra of monolayer PSbC.

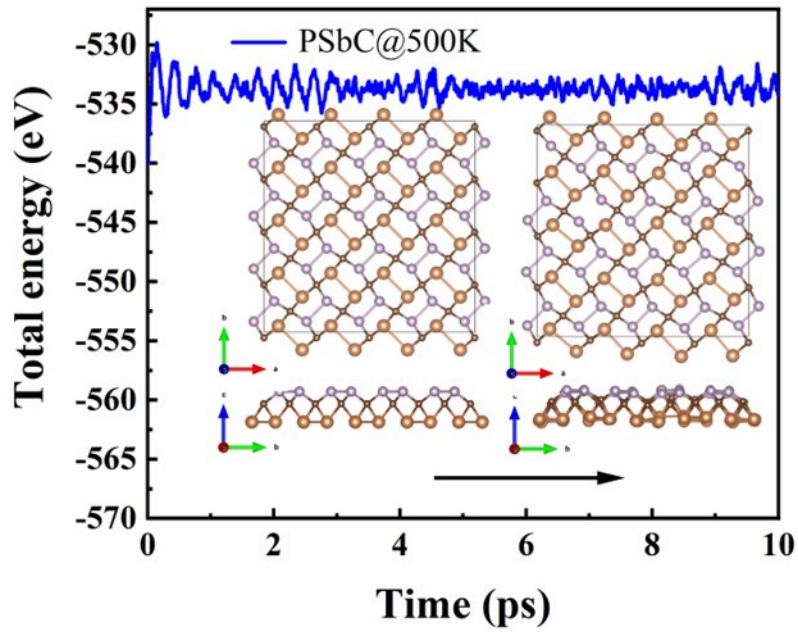

**Fig. S2** The total energy of monolayer PSbC and corresponding supercells structure through 10 ps canonical ensemble (NVT) MD simulation with initial temperature set as 500 K.

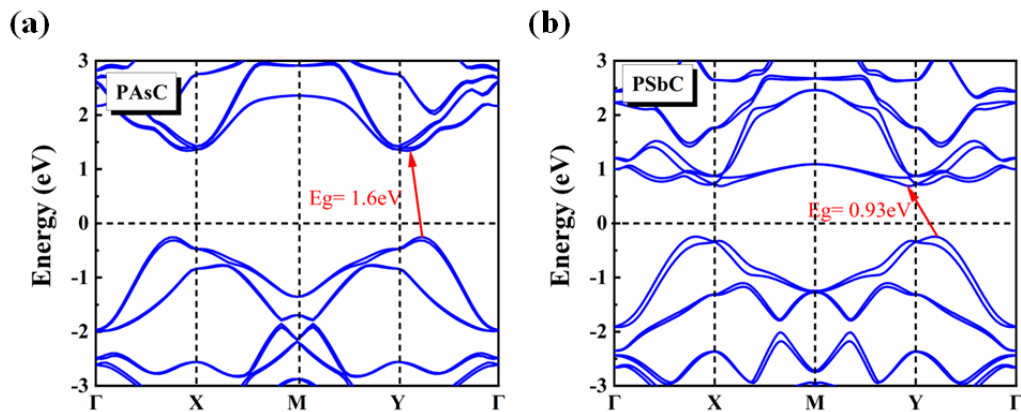

**Fig. S3** Calculated band structures of for (a) PAsC and (b) PSbC monolayers employing the PBE + SOC method

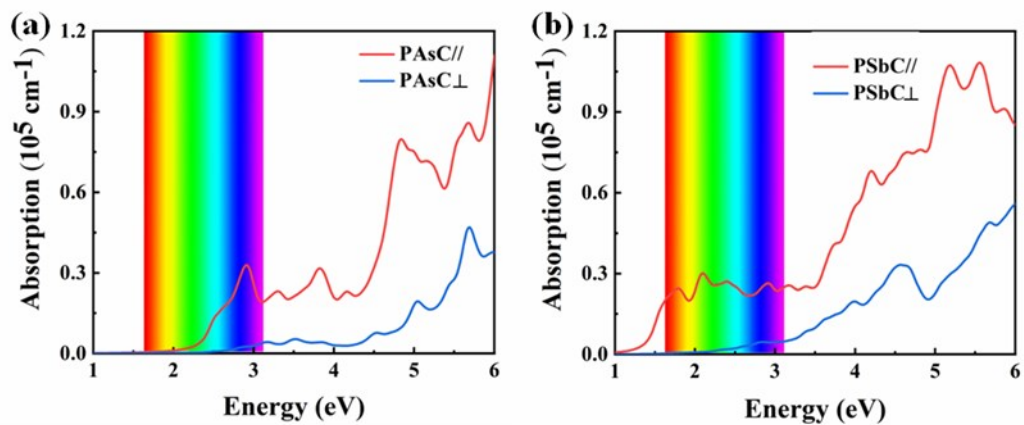

**Fig. S4** The calculated optical absorption spectrum of (a) PAsC and (b) PSbC monolayers using HSE06 functional.
